# Supplementary material for: Dissecting meiotic recombination based on tetrad analysis by single-microspore sequencing in maize
Source: PubMed Central journal article supplement (PMC4383000; doi:10.1038/ncomms7648), 2015-03-24
Supplement: ncomms7648-s1.pdf [file ncomms7648-s1.pdf]

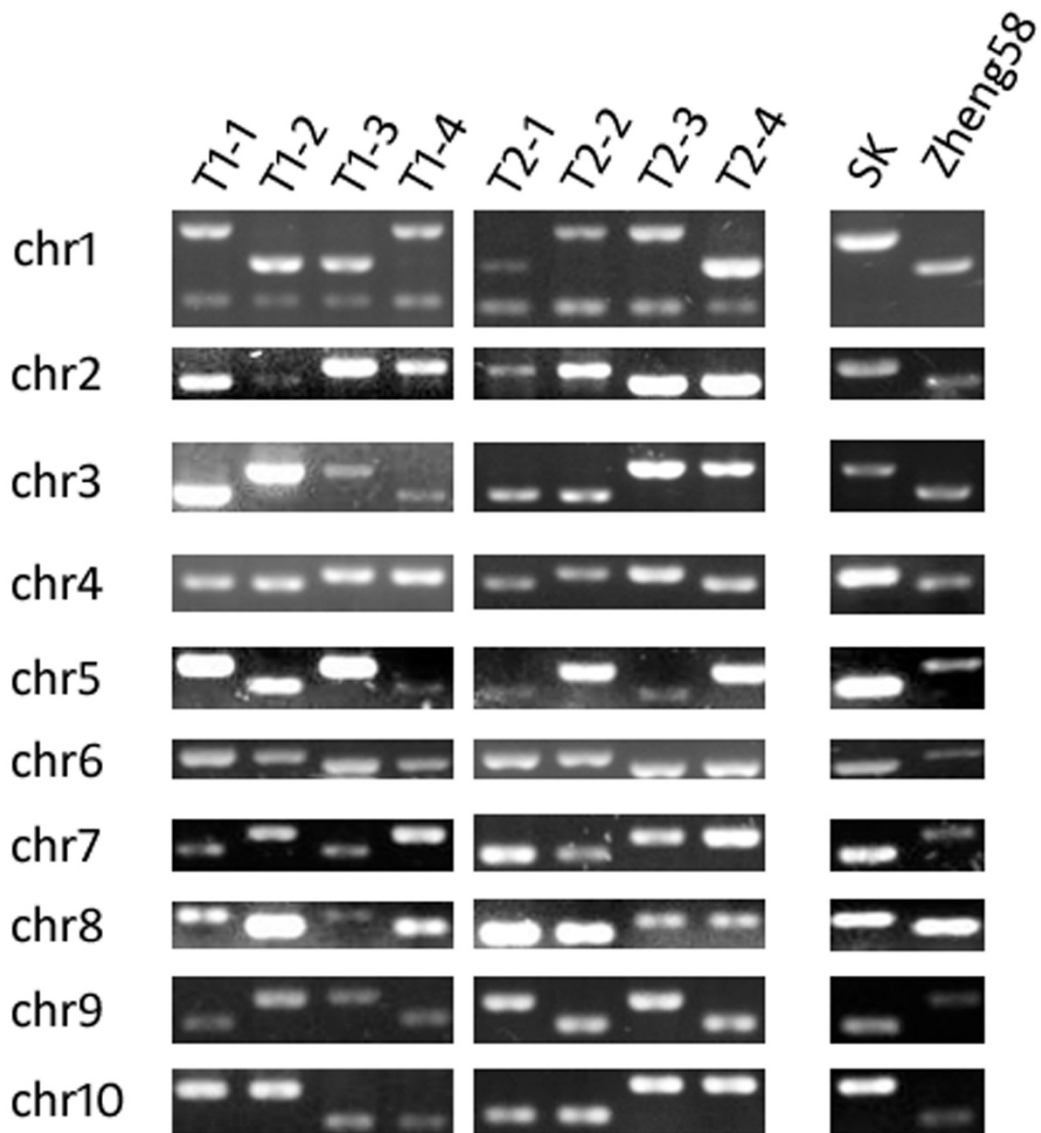

**Supplementary Figure 1 | Examples of detection of MDA products based on molecular markers.** To assess quality of whole-genome amplification by MDA, we selected 10 markers (one per chromosome), segregating between the two parents (SK and Zheng58). High-quality of MDA would be indicated by the proper segregation ratio (2:2) of tested markers. T1-1, T1-2, T1-3 and T1-4 are the four microspores of tetrad 1, respectively. T2-1, T2-2, T2-3 and T2-4 are the four microspores of tetrad 2, respectively.

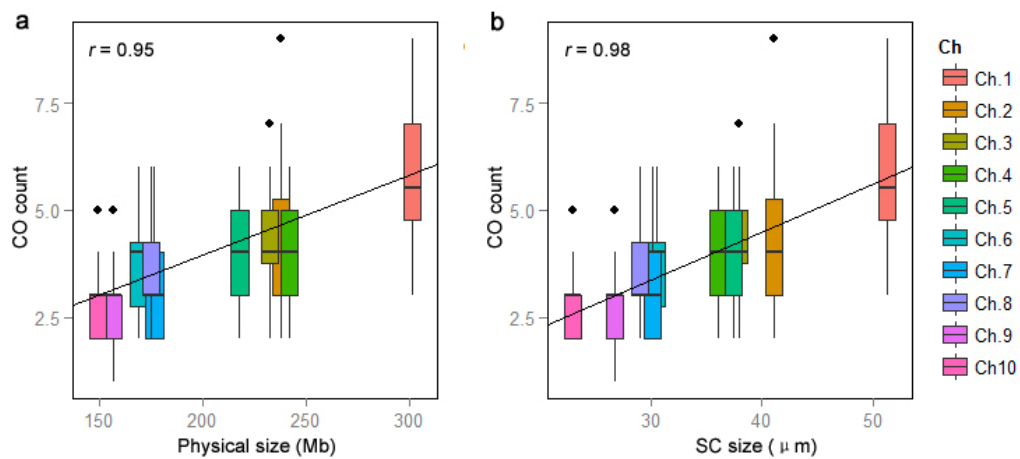

**Supplementary Figure 2 | Relationships between CO counts in each chromosome, chromosome length and synaptonemal complex (SC) size.** The positive correlations between CO count and physical size (a) and SC size (b) are presented.  $r$  is the Pearson correlation coefficient. The error bars mark the range from 5th and 95th percentile of the total sets (a, b). SC size was adopted from maize KYS inbred<sup>1</sup>.

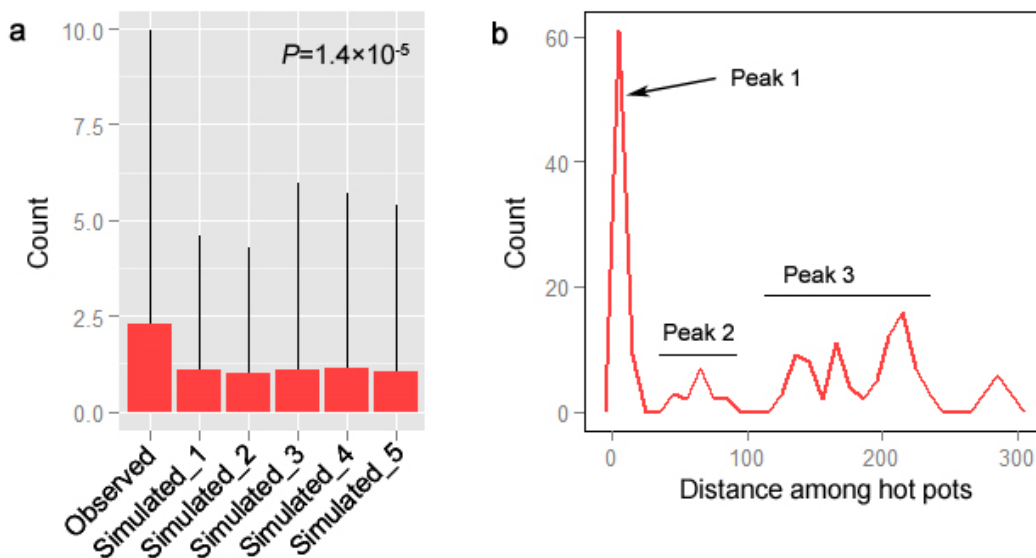

**Supplementary Figure 3 | Crossover hot spots.** Totally, 64 crossover hot spots were characterized, with at least 5 COs per 3 Mb. (a) The CO count in regions 10 Mb away from these hot spots is significantly more than those simulated, which is shown as the Peak 1 in b. Error bars mark the range from 5th and 95th percentile of the total data (a). (b) The distribution of interval distances between pairs of crossover hot spots. Three peaks which may correspond to the peaks in Figure 4B, were observed.

**Supplementary Table 1. Validation of 12 tetrads by SNP array**

| Sample | Non-polymorphic<br>SNPs | Rate  | Polymorphic<br>SNPs | Rate  | Heterozygous<br>SNPs | Rate |
|--------|-------------------------|-------|---------------------|-------|----------------------|------|
| T1-1   | 1167                    | 59.9% | 684                 | 35.1% | 14                   | 0.7% |
| T1-2   | 1170                    | 60.1% | 651                 | 33.4% | 35                   | 1.8% |
| T1-3   | 1140                    | 58.5% | 722                 | 37.1% | 1                    | 0.1% |
| T1-4   | 1046                    | 53.7% | 695                 | 35.7% | 0                    | 0.0% |
| T2-1   | 1172                    | 60.2% | 645                 | 33.1% | 52                   | 2.7% |
| T2-2   | 1074                    | 55.1% | 740                 | 38.0% | 1                    | 0.1% |
| T2-3   | 1122                    | 57.6% | 749                 | 38.4% | 1                    | 0.1% |
| T2-4   | 1123                    | 57.6% | 740                 | 38.0% | 0                    | 0.0% |
| T3-1   | 1103                    | 56.6% | 729                 | 37.4% | 0                    | 0.0% |
| T3-2   | 1090                    | 56.0% | 732                 | 37.6% | 1                    | 0.1% |
| T3-3   | 1041                    | 53.4% | 632                 | 32.4% | 39                   | 2.0% |
| T3-4   | 1172                    | 60.2% | 614                 | 31.5% | 67                   | 3.4% |
| T4-1   | 1169                    | 60.0% | 618                 | 31.7% | 64                   | 3.3% |
| T4-2   | 1108                    | 56.9% | 735                 | 37.7% | 0                    | 0.0% |
| T4-3   | 1087                    | 55.8% | 720                 | 37.0% | 0                    | 0.0% |
| T4-4   | 1038                    | 53.3% | 681                 | 35.0% | 2                    | 0.1% |
| T7-1   | 1095                    | 56.2% | 720                 | 37.0% | 3                    | 0.2% |
| T7-2   | 1083                    | 55.6% | 705                 | 36.2% | 1                    | 0.1% |
| T7-3   | 1101                    | 56.5% | 720                 | 37.0% | 1                    | 0.1% |
| T7-4   | 1139                    | 58.5% | 662                 | 34.0% | 21                   | 1.1% |
| T9-1   | 781                     | 40.1% | 519                 | 26.6% | 0                    | 0.0% |
| T9-2   | 1128                    | 57.9% | 743                 | 38.1% | 0                    | 0.0% |
| T9-3   | 1129                    | 58.0% | 747                 | 38.3% | 1                    | 0.1% |
| T9-4   | 1124                    | 57.7% | 737                 | 37.8% | 4                    | 0.2% |
| T10-1  | 966                     | 49.6% | 589                 | 30.2% | 21                   | 1.1% |
| T10-2  | 1080                    | 55.4% | 727                 | 37.3% | 0                    | 0.0% |
| T10-3  | 1106                    | 56.8% | 714                 | 36.7% | 2                    | 0.1% |
| T10-4  | 1079                    | 55.4% | 729                 | 37.4% | 1                    | 0.1% |
| T11-1  | 993                     | 51.0% | 654                 | 33.6% | 0                    | 0.0% |
| T11-2  | 1015                    | 52.1% | 678                 | 34.8% | 0                    | 0.0% |
| T11-3  | 989                     | 50.8% | 663                 | 34.0% | 0                    | 0.0% |
| T11-4  | 1074                    | 55.1% | 721                 | 37.0% | 0                    | 0.0% |
| T12-1  | 1062                    | 54.5% | 688                 | 35.3% | 0                    | 0.0% |
| T12-2  | 1072                    | 55.0% | 713                 | 36.6% | 1                    | 0.1% |
| T12-3  | 1121                    | 57.5% | 751                 | 38.6% | 0                    | 0.0% |
| T12-4  | 1122                    | 57.6% | 746                 | 38.3% | 0                    | 0.0% |
| T15-1  | 1137                    | 58.4% | 742                 | 38.1% | 0                    | 0.0% |
| T15-2  | 1122                    | 57.6% | 747                 | 38.3% | 0                    | 0.0% |
| T15-3  | 1089                    | 55.9% | 732                 | 37.6% | 0                    | 0.0% |
| T15-4  | 1106                    | 56.8% | 735                 | 37.7% | 1                    | 0.1% |
| T17-1  | 1143                    | 58.7% | 759                 | 39.0% | 0                    | 0.0% |

|           |      |       |     |       |    |      |
|-----------|------|-------|-----|-------|----|------|
| T17-2     | 1141 | 58.6% | 761 | 39.1% | 0  | 0.0% |
| T17-3     | 1134 | 58.2% | 747 | 38.3% | 0  | 0.0% |
| T17-4     | 1113 | 57.1% | 747 | 38.3% | 0  | 0.0% |
| T22-1     | 1108 | 56.9% | 742 | 38.1% | 1  | 0.1% |
| T22-2     | 1124 | 57.7% | 734 | 37.7% | 0  | 0.0% |
| T22-3     | 1116 | 57.3% | 742 | 38.1% | 0  | 0.0% |
| T22-4     | 1165 | 59.8% | 691 | 35.5% | 30 | 1.5% |
| SK-1      | 1165 | 59.8% | 775 | 39.8% | 0  | 0.0% |
| SK-2      | 1166 | 59.9% | 775 | 39.8% | 0  | 0.0% |
| Zheng58-1 | 1173 | 60.2% | 775 | 39.8% | 0  | 0.0% |
| Zheng58-2 | 1142 | 58.6% | 766 | 39.3% | 1  | 0.1% |

**Supplementary Table 2. SNPs count in 10 chromosomes**

|                   | chr1   | chr2   | chr3   | chr4   | chr5   | chr6  | chr7   | chr8   | chr9  | chr10 | total   |
|-------------------|--------|--------|--------|--------|--------|-------|--------|--------|-------|-------|---------|
| Raw SNPs          | 176983 | 137074 | 154878 | 156364 | 129244 | 99226 | 115994 | 115918 | 95289 | 88618 | 1269588 |
| High-quality SNPs | 82710  | 66738  | 75737  | 72921  | 56536  | 48245 | 53098  | 54330  | 46141 | 42698 | 599154  |

**Supplementary Table 3. CO counts at the tetrad level in 10 chromosomes**

| Tetrad | Individual (Donor) | Chr1 | Chr2 | Chr3 | Chr4 | Chr5 | Chr6 | Chr7 | Chr8 | Chr9 | Chr10 | All chr. |
|--------|--------------------|------|------|------|------|------|------|------|------|------|-------|----------|
| 3      | 1                  | 5    | 4    | 4    | 2    | 3    | 3    | 3    | 3    | 2    | 2     | 31       |
| 4      | 1                  | 3    | 3    | 4    | 3    | 2    | 2    | 2    | 5    | 3    | 2     | 29       |
| 5      | 1                  | 3    | 3    | 2    | 3    | 3    | 2    | 2    | 2    | 2    | 2     | 24       |
| 6      | 1                  | 5    | 4    | 4    | 4    | 4    | 4    | 2    | 3    | 1    | 3     | 34       |
| 7      | 1                  | 4    | 3    | 3    | 4    | 2    | 3    | 2    | 2    | 3    | 3     | 29       |
| 8      | 1                  | 6    | 5    | 5    | 5    | 3    | 5    | 3    | 4    | 3    | 3     | 42       |
| 9      | 1                  | 3    | 4    | 3    | 3    | 5    | 2    | 4    | 3    | 3    | 2     | 32       |
| 1      | 2                  | 7    | 2    | 4    | 4    | 5    | 5    | 5    | 5    | 3    | 3     | 43       |
| 2      | 2                  | 5    | 7    | 2    | 6    | 4    | 4    | 3    | 3    | 4    | 3     | 41       |
| 10     | 2                  | 6    | 4    | 6    | 3    | 3    | 2    | 3    | 3    | 2    | 2     | 34       |
| 11     | 2                  | 8    | 5    | 6    | 5    | 6    | 6    | 2    | 4    | 3    | 3     | 48       |
| 12     | 2                  | 9    | 4    | 6    | 5    | 5    | 5    | 2    | 5    | 5    | 3     | 49       |
| 13     | 2                  | 7    | 3    | 5    | 4    | 5    | 5    | 3    | 4    | 3    | 5     | 44       |
| 14     | 2                  | 5    | 4    | 5    | 3    | 4    | 3    | 2    | 3    | 2    | 2     | 33       |
| 15     | 2                  | 6    | 5    | 3    | 2    | 5    | 2    | 3    | 3    | 2    | 3     | 34       |
| 16     | 2                  | 5    | 6    | 4    | 5    | 5    | 6    | 4    | 2    | 2    | 3     | 42       |
| 17     | 2                  | 7    | 9    | 7    | 5    | 4    | 4    | 3    | 6    | 3    | 2     | 50       |
| 18     | 2                  | 6    | 4    | 4    | 5    | 4    | 4    | 5    | 5    | 3    | 3     | 43       |
| 19     | 2                  | 5    | 6    | 2    | 5    | 5    | 4    | 6    | 2    | 2    | 2     | 39       |
| 20     | 2                  | 8    | 6    | 4    | 3    | 4    | 4    | 4    | 5    | 2    | 4     | 44       |
| 21     | 2                  | 6    | 3    | 5    | 5    | 5    | 4    | 5    | 2    | 3    | 3     | 41       |

|    |   |   |   |   |   |   |   |   |   |   |   |    |
|----|---|---|---|---|---|---|---|---|---|---|---|----|
| 22 | 2 | 4 | 4 | 4 | 4 | 3 | 4 | 4 | 4 | 5 | 3 | 39 |
| 23 | 2 | 4 | 3 | 5 | 3 | 6 | 3 | 4 | 4 | 3 | 2 | 37 |
| 24 | 2 | 7 | 6 | 5 | 4 | 6 | 2 | 4 | 3 | 3 | 2 | 42 |

**Supplementary Table 4. Comparison of CO counts between two different F<sub>1</sub> individuals**

|                 | Tetrad                    | Chr1 | Chr2 | Chr3 | Chr4 | Chr5 | Chr6 | Chr7 | Chr8 | Chr9 | Chr10 | All  |
|-----------------|---------------------------|------|------|------|------|------|------|------|------|------|-------|------|
| all individuals | CO_total                  | 134  | 107  | 102  | 95   | 101  | 88   | 80   | 85   | 67   | 65    | 924  |
| all individuals | CO_average (tetrad level) | 5.6  | 4.5  | 4.3  | 4.0  | 4.2  | 3.7  | 3.3  | 3.5  | 2.8  | 2.7   | 38.5 |
| all individuals | CO_average (cell level)   | 2.8  | 2.2  | 2.1  | 2.0  | 2.1  | 1.8  | 1.7  | 1.8  | 1.4  | 1.4   | 19.3 |
| Individual 1    | CO_total                  | 29   | 26   | 25   | 24   | 22   | 21   | 18   | 22   | 17   | 17    | 221  |
| Individual 1    | CO_average (tetrad level) | 4.1  | 3.7  | 3.6  | 3.4  | 3.1  | 3.0  | 2.6  | 3.1  | 2.4  | 2.4   | 31.6 |
| Individual 1    | CO_average (cell level)   | 2.1  | 1.9  | 1.8  | 1.7  | 1.6  | 1.5  | 1.3  | 1.6  | 1.2  | 1.2   | 15.8 |
| Individual 2    | CO_total                  | 105  | 81   | 77   | 71   | 79   | 67   | 62   | 63   | 50   | 48    | 703  |
| Individual 2    | CO_average (tetrad level) | 6.2  | 4.8  | 4.5  | 4.2  | 4.6  | 3.9  | 3.6  | 3.7  | 2.9  | 2.8   | 41.4 |
| Individual 2    | CO_average (cell level)   | 3.1  | 2.4  | 2.3  | 2.1  | 2.3  | 2.0  | 1.8  | 1.9  | 1.5  | 1.4   | 20.7 |
| RIL             | CO_total                  | 1419 | 1028 | 929  | 917  | 868  | 679  | 733  | 689  | 636  | 418   | 8316 |
| RIL             | CO_average                | 7.0  | 5.0  | 4.6  | 4.5  | 4.3  | 3.3  | 3.6  | 3.4  | 3.1  | 2.0   | 40.8 |

**Supplementary Table 5. PCR primers used in this study**

| Name            | Sequence                                                  | Note                   |
|-----------------|-----------------------------------------------------------|------------------------|
| CO-1(section 1) | 5'-CTATGCCGGTAAGGTTGGATTC-3'/5'-CCGAGTTGTTTCATACGAGACT-3' | Figure 3a              |
| CO-1(section 2) | 5'-GCACCCATTATGAGTTTCTACC-3'/5'-GGCTCTGCTGCCTGACTTAT-3'   | Figure 3a              |
| CO-2            | 5'-GGCGTGCTAGGACAGCAAAC-3'/5'-GTCTACACCACTCACAATGGC-3'    | Figure 3b              |
| CO-3            | 5'-CACAAACCGGGACTTGCTAC-3'/5'-AAAGAGCGCCAAGTACCAGC-3'     | Figure 3c              |
| CO-4            | 5'-CAGTGACTTGTACGGCTCCC-3'/5'-CACAAATCACGCCTCAGAGC-3'     | Figure 3d              |
| CO-5            | 5'-TCCGTGACCACCTTAGCAAC-3'/5'-TCTCGGTTGGATTTCGCCTTC-3'    | Figure 3e              |
| maker_chr1      | 5'-AAGTGGTGAGGTAAGCCTGC-3'/5'-ATAGGAGACACCCTGGGCAT-3'     | Supplementary Figure 1 |
| maker_chr2      | 5'-CTCTTCCAATCGGGTTTGC-3'/5'-AATTGCACATAACAGAGGCG-3'      | Supplementary Figure 1 |
| maker_chr3      | 5'-CTCAGGAGGAGGAAATGTGG-3'/5'-CTTCTGTCCGTGAAGGATGG-3'     | Supplementary Figure 1 |
| maker_chr4      | 5'-AAGAACAGCATTGTCGTCACC-3'/5'-GTCCAGCGTCAGAGCTTACC-3'    | Supplementary Figure 1 |
| maker_chr5      | 5'-AAAGCACTTACATCATGGGAAAC-3'/5'-TTGGTGTAGCTCCGATTTG-3'   | Supplementary Figure 1 |
| maker_chr6      | 5'-CATAGTCCGATCTTGGTGACG-3'/5'-CATACAGGGAGTCACGGTCC-3'    | Supplementary Figure 1 |
| maker_chr7      | 5'-AGCACCAGGAAGTTGTGAGG-3'/5'-CCAACCTCGATACGAAGAGCC-3'    | Supplementary Figure 1 |
| maker_chr8      | 5'-TCCAAGTCCCATGGCAGAAC-3'/5'-CCATGCTAGCTGATCGTCGT-3'     | Supplementary Figure 1 |
| maker_chr9      | 5'-CCCGAGTTGCATGGAAGACA-3'/5'-CGTGCGTTTGAATTGGCTGA-3'     | Supplementary Figure 1 |
| maker_chr10     | 5'-CCTTCTAATTAAGTCAAAGCCA-3'/5'-CAACACCAACATCCGTGCT-3'    | Supplementary Figure 1 |

## Supplementary References

1. Falque, M., Anderson, L. K., Stack, S. M., Gauthier, F. & Martin, O. C. Two types of meiotic crossovers coexist in maize, *Plant Cell* **21**, 3915-3925 (2009).
